# Supplementary material
Source: PubMed Central journal article supplement (PMC395917)

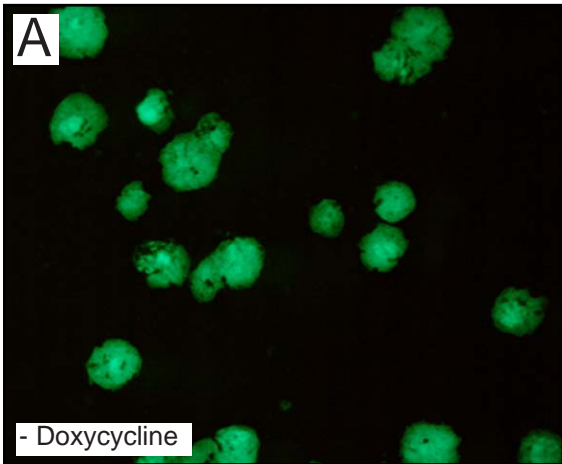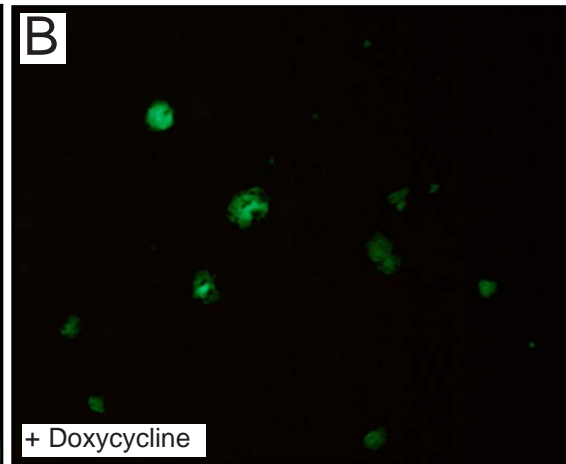

Supplement: pnas_101_16_6027__2.pdf [file pnas_101_16_6027__2.pdf]
